# Supplementary material for: A tetrathiafulvalene-containing covalent organic nanobelt: preparation, crystal structure and application for sodium-ion batteries
Source: PubMed Central journal article supplement (PMC11580028; doi:10.1039/d4sc06300g), 2024-11-14
Supplement: SC-OLF-D4SC06300G-s001.pdf [file SC-OLF-D4SC06300G-s001.pdf]

## Supporting Information

### A Tetrathiafulvalene-Containing Covalent Organic Nanobelt: Preparation, Crystal Structure and Application for Sodium-Ion Battery

Xin Wang, Yuchan Zhang, Lei Zhang, Qianfeng Gu, Qi Liu, Yang Ren, Chun Sin Lee, and Qichun Zhang\*

#### 1. Materials and methods

All chemicals and solvents were used directly without purification if not specified. PXRD pattern was collected by Rigaku X-ray Diffractometer Smatlab™ 9kW. Thermal analysis was conducted on PerkinElmer Simultaneous Thermal Analyzer (STA) 6000 from 30 to 800 °C at a heating rate of 10 °C min<sup>-1</sup> under N<sub>2</sub>. UV-Vis spectra from 300 to 1500 nm were carried out on Hitachi UH4150 UV-VIS-NIR Spectrophotometer. FTIR spectra (4000 to 500 cm<sup>-1</sup>) were tested on a Perkin Elmer Spectrum II.

SCXRD test of **CityU-26** was conducted on the Rigaku X-ray Single Crystal Diffractometer System (Rigaku SmartLab 9kW-Advance) at room temperature using the monochromatized wavelength (Cu K $\alpha$ ) = 1.54184 Å. The crystal structures were solved and refined by full matrix least-squares methods against F<sub>2</sub> using the SHELXL-2013-2 program package and Olex-2 software. All non-hydrogen atoms were refined with anisotropic displacement parameters and hydrogen positions were fixed at calculated positions and refined.

#### Synthesis of CityU-26

5 mg TTF-py and 3mg BACT were added into the mixture of 3 mL toluene and 1 mL methanol, followed by sonication to get a clear solution. Red crystals could be obtained after the slow evaporation of the solution at 85 °C overnight.

#### Electrochemical measurements

**CityU-26**, super P and PVDF binder were mixed with the weight ratio of 6:3:1. Then the slurry after stirring 12 h was evenly coated on the Al foil and dried at 80 °C in vacuum oven overnight to obtain the pole piece.

The CR2032 coin cells were assembled at the glovebox to investigate the electrochemical performance of **CityU-26** in SIBs. Na metal as the counter electrode, glass fiber as the separator and 1M NaPF<sub>6</sub> in DIGLYME as the electrolyte. The galvanostatic cycling performance measurement was executed on the Neware battery test system CT-4008. The CV test was

carried out with the voltage range between 0.01 and 3 V at the scan rate of 0.1 mV s<sup>-1</sup>. All electrochemical measurements were carried out at 25 °C.

## 2. Synthesis of Monomers

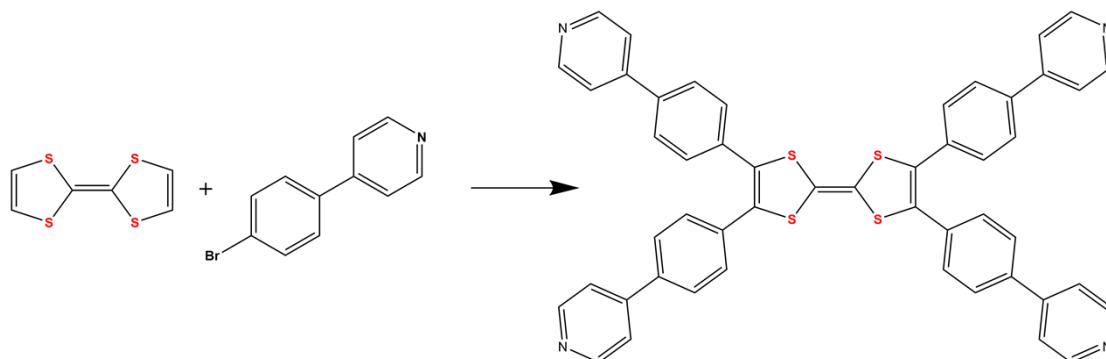

**Fig. S1.** Synthetic route to TTF-py.

To 20 mL distilled dioxane was added palladium acetate (82 mg), tri-tert-butylphosphonium tetrafluoroborate (320 mg), and cesium carbonate (2.40 g). Then, the suspension was heated at 90 °C for 10 min under argon, followed by the addition of an argon-degassed dioxane including tetrathiafulvalene (300 mg, 1.46 mmol) and 4-(4-Bromo-phenyl)-pyridine (1.7 g). The reaction was stirred under reflux for 72 h. After cooling, the products were extracted from chloroform and purified by chromatography on silicon gel.

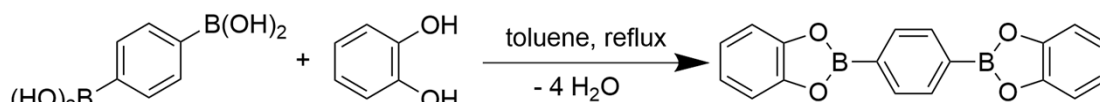

**Fig. S2.** Synthetic route to BACT.

Benzene-1,4-diboronic acid (0.5055 g) and catechol (0.72 g) were added to a 100-mL flask with 40 mL toluene. The mixture was heated under reflux overnight with a Dean–Stark trap filled half full with 3 Å sieves. White needle-like crystals were obtained by solvent evaporation under reduced pressure, followed by sublimation to remove excess catechol.

### 3. Characterization

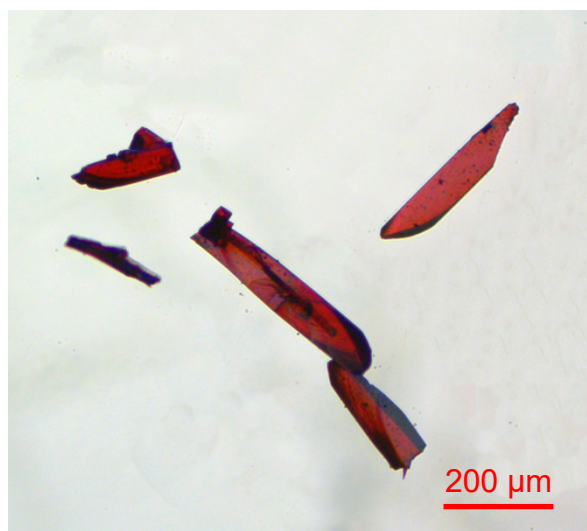

**Fig. S3.** Optical image of CityU-26 crystals.

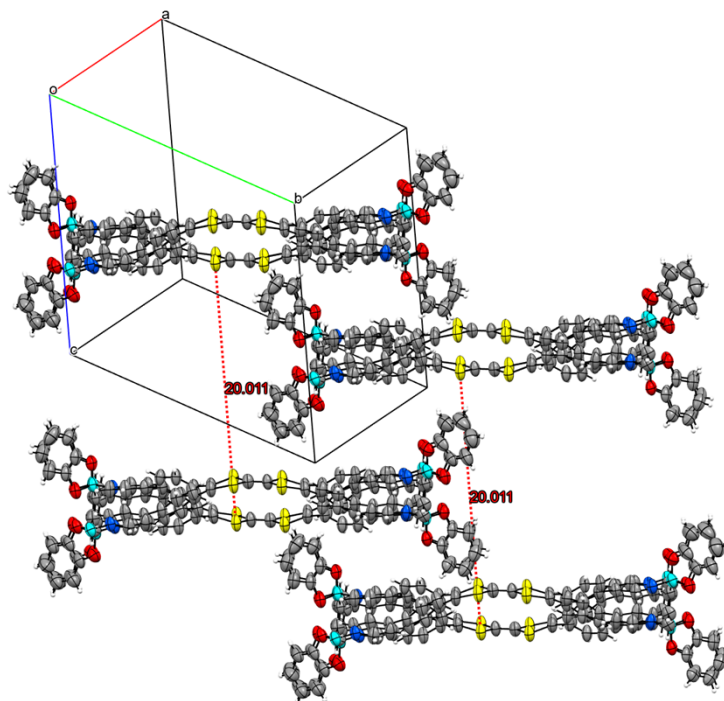

**Fig. S4.** The packing diagram of the nanobelts in CityU-26.

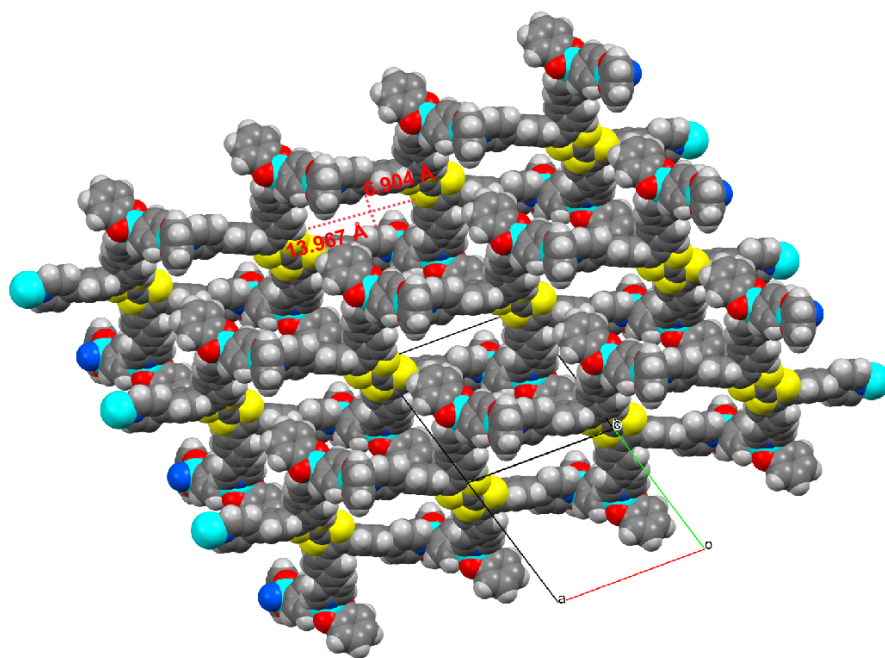

**Fig. S5.** Rhombic channels in CityU-26.

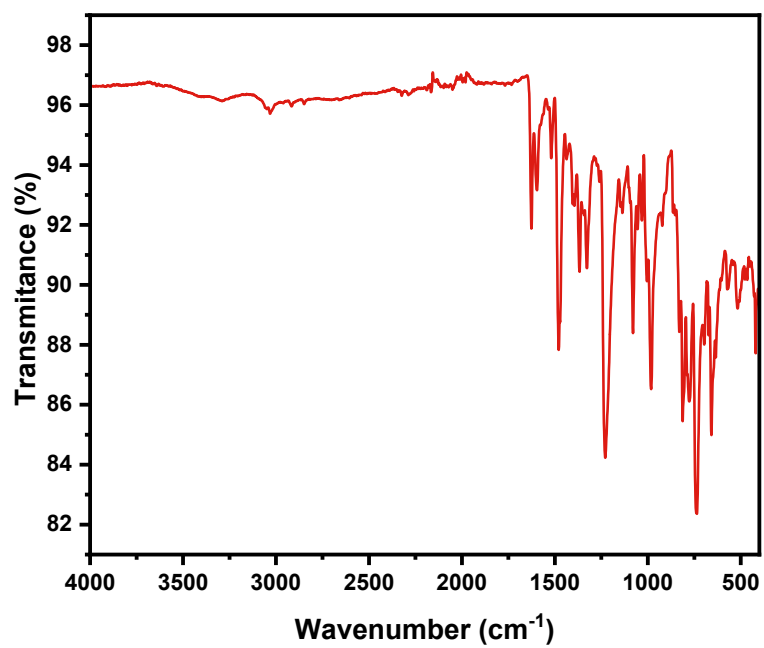

**Fig. S6.** FTIR spectrum of CityU-26.

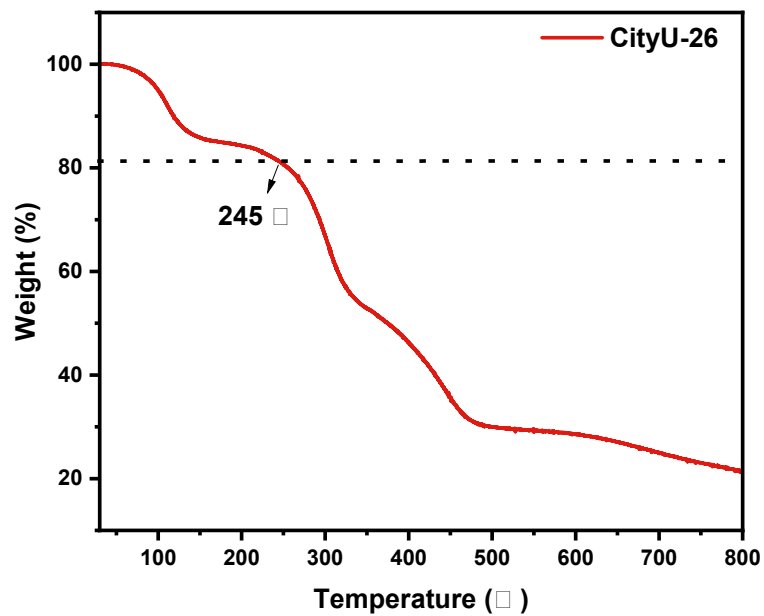

Fig. S7. TGA curve of CityU-26.

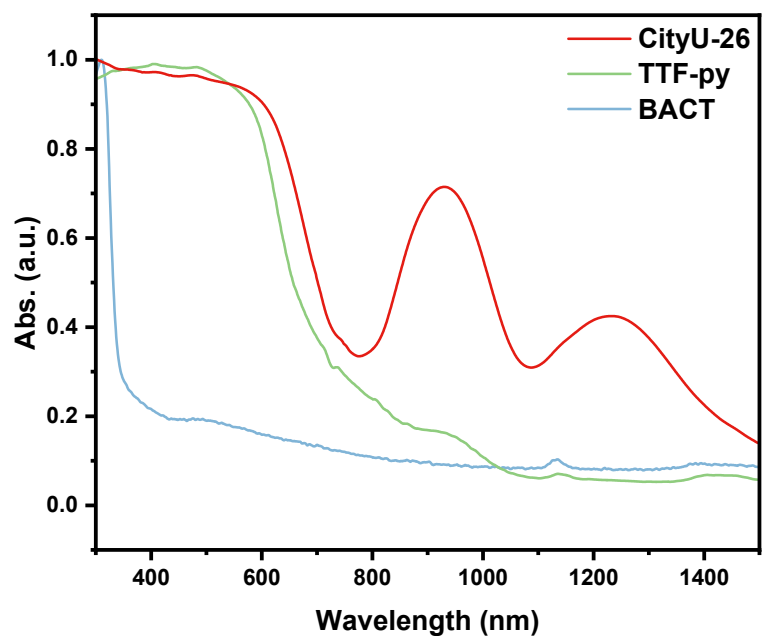

Fig. S8. UV-Vis spectra of CityU-26, TTF-py and BACT.

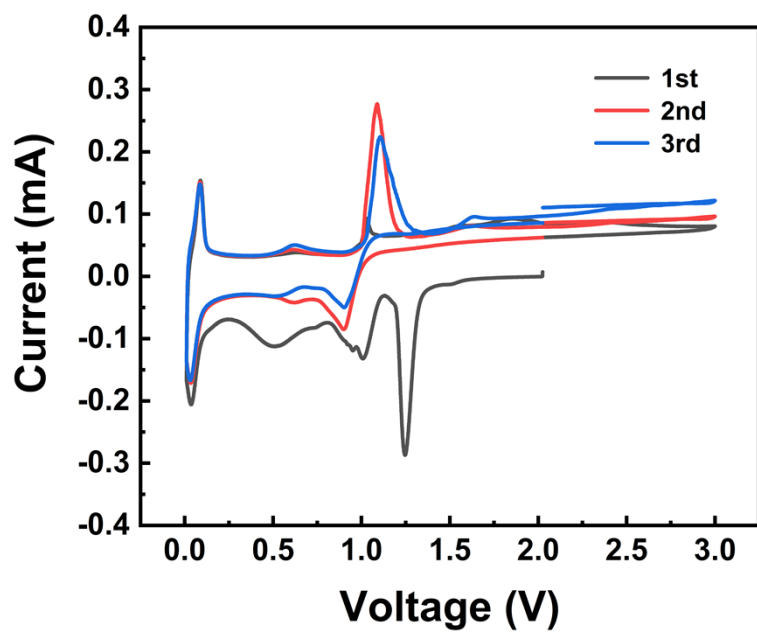

Fig. S9. The CV curves of TTF-py.

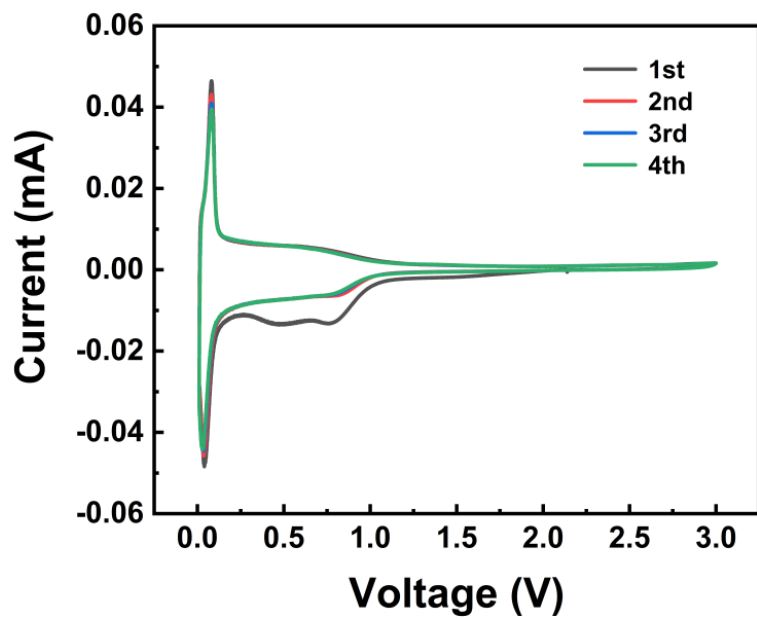

Fig. S10. The CV curves of Super P.

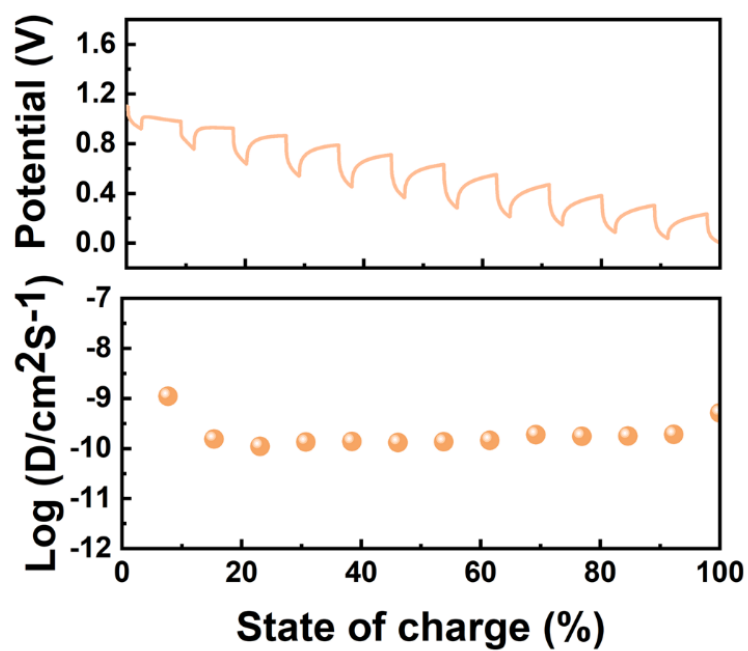

Fig. S11. The GITT curves and the corresponding Na<sup>+</sup> diffusion coefficients.

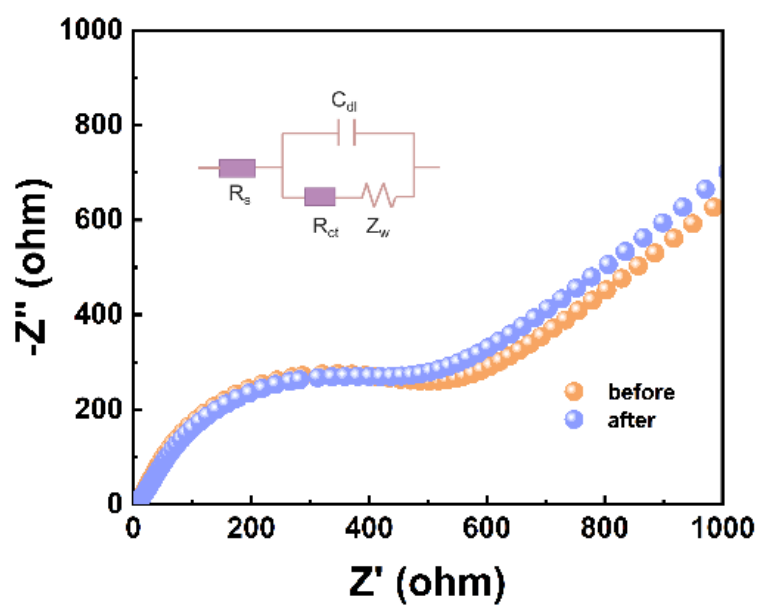

Fig. S12. Impedance of the CityU-26-based anode before and after cycling.

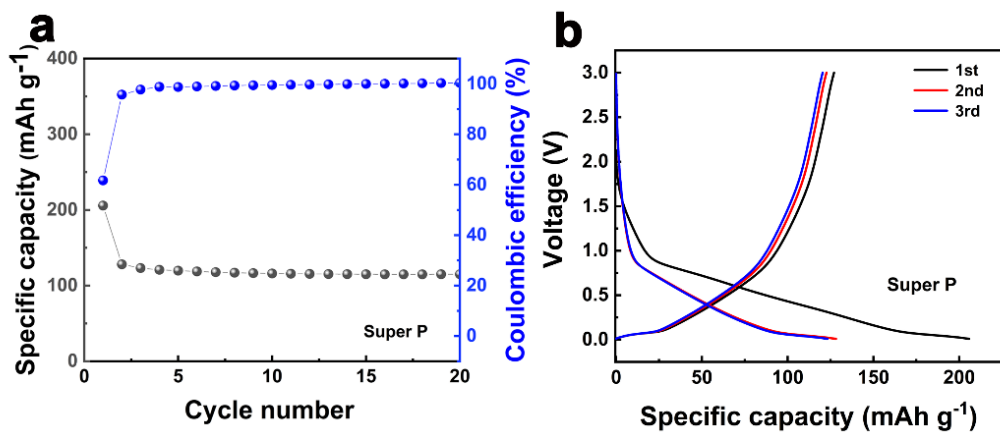

Fig. S13. The cyclic performance of Super P at 150 mA g<sup>-1</sup>, (b) Charge-discharge voltage profiles of carbon black Super P.

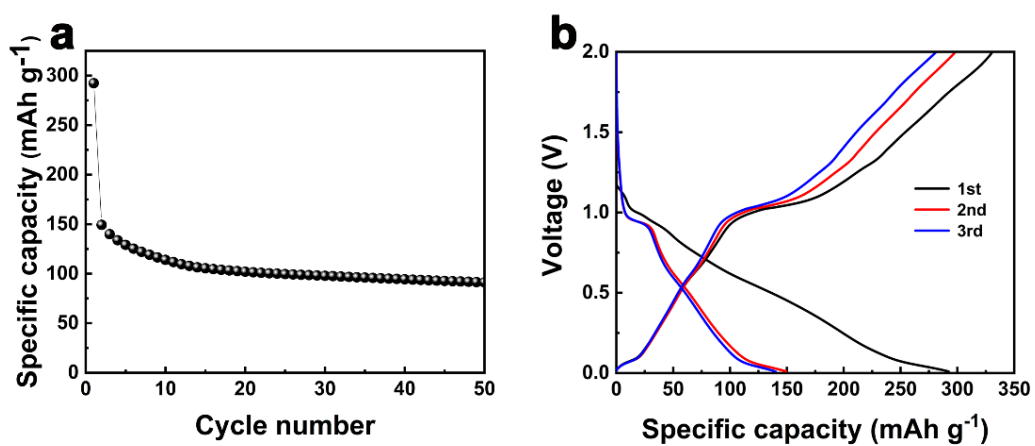

Fig. S14. The cyclic performance of TTF-py at 150 mA g<sup>-1</sup>, (b) Charge-discharge voltage profiles of TTF-py.



**Table S1.** Crystal data and structure refinement of **CityU-26**.

| <b>CityU-26</b>                                     |                                       |
|-----------------------------------------------------|---------------------------------------|
| <b>Empirical formula</b>                            | $C_{86}H_{56}B_4N_4O_8S_4$            |
| <b>Formula weight</b>                               | 1444.82                               |
| <b>Crystal system</b>                               | triclinic                             |
| <b>Space group</b>                                  | <i>P</i> -1                           |
| <b><i>a</i> (Å)</b>                                 | 16.3894(3)                            |
| <b><i>b</i> (Å)</b>                                 | 17.8532(4)                            |
| <b><i>c</i> (Å)</b>                                 | 20.0109(5)                            |
| <b><math>\alpha</math> (°)</b>                      | 65.460(2)                             |
| <b><math>\beta</math> (°)</b>                       | 79.648(2)                             |
| <b><math>\gamma</math> (°)</b>                      | 73.025(2)                             |
| <b><i>V</i> (Å<sup>3</sup>)</b>                     | 5082.8(2)                             |
| <b><i>Z</i></b>                                     | 2                                     |
| <b><i>D</i><sub>calc</sub>(g • cm<sup>-3</sup>)</b> | 0.944                                 |
| <b>Abs.coeff.(mm<sup>-1</sup>)</b>                  | 1.217                                 |
| <b><i>F</i>(000)</b>                                | 1496                                  |
| <b>Reflns collected</b>                             | 55553                                 |
| <b>GOF on <i>F</i><sup>2</sup></b>                  | 1.067                                 |
| <b>Final R indexes [<i>I</i> ≥ 2σ (<i>I</i>)]</b>   | R1 = 0.1041, wR <sub>2</sub> = 0.3175 |
| <b>Final R indexes [all data]</b>                   | R1 = 0.1304, wR <sub>2</sub> = 0.3509 |

**Table S2.** Selected bond distance (Å) of **CityU-26**.

| Atom1 | Atom2           | Length/Å  |
|-------|-----------------|-----------|
| O1    | B1              | 1.494(5)  |
| O2    | B1              | 1.446(6)  |
| N2    | B1              | 1.640(5)  |
| C31   | B1              | 1.594(6)  |
| O6    | B2              | 1.41(2)   |
| O5    | B2              | 1.453(17) |
| N3    | B2              | 1.653(5)  |
| C36   | B2              | 1.585(6)  |
| O8    | B3              | 1.501(5)  |
| O7    | B3              | 1.458(6)  |
| N4    | B3              | 1.660(5)  |
| C82   | B3              | 1.574(6)  |
| O10   | B4              | 1.470(6)  |
| O9    | B4              | 1.475(6)  |
| C85   | B4              | 1.596(6)  |
| N1    | B4 <sup>2</sup> | 1.648(5)  |
| B4    | N1 <sup>3</sup> | 1.648(5)  |
| B2    | O3              | 1.539(16) |
| B2    | O4              | 1.525(19) |
| C62   | S1 <sup>1</sup> | 1.751(4)  |
| C12   | S2 <sup>1</sup> | 1.761(4)  |

<sup>1</sup>1-X,-Y,2-Z;<sup>2</sup>2+X,-1+Y,1+Z;<sup>3</sup>-2+X,1+Y,-1+Z

**Table S3.** Selected bond angles (°) of **CityU-26**.

| Atom1 | Atom2 | Atom3           | Angle/°   |
|-------|-------|-----------------|-----------|
| C23   | N2    | B1              | 121.4(3)  |
| C24   | N2    | B1              | 120.2(3)  |
| C25   | O2    | B1              | 105.8(3)  |
| C26   | O1    | B1              | 104.8(3)  |
| C43   | O6    | B2              | 107.8(11) |
| C44   | O5    | B2              | 104.7(10) |
| C49   | N3    | B2              | 120.9(3)  |
| C50   | N3    | B2              | 121.1(3)  |
| C73   | N4    | B3              | 119.4(3)  |
| C74   | N4    | B3              | 122.5(3)  |
| C75   | O7    | B3              | 106.5(3)  |
| C76   | O8    | B3              | 105.2(3)  |
| C87   | O9    | B4              | 104.2(4)  |
| C88   | O10   | B4              | 106.9(4)  |
| C2    | N1    | B4 <sup>2</sup> | 120.6(3)  |
| C3    | N1    | B4 <sup>2</sup> | 121.2(3)  |
| C37   | O4    | B2              | 105.3(9)  |
| C38   | O3    | B2              | 104.8(11) |
| O10   | B4    | N1 <sup>3</sup> | 107.2(3)  |
| O9    | B4    | N1 <sup>3</sup> | 105.9(4)  |
| C85   | B4    | N1 <sup>3</sup> | 107.4(3)  |
| O1    | B1    | N2              | 105.3(3)  |
| O2    | B1    | N2              | 105.9(3)  |
| C31   | B1    | N2              | 111.1(3)  |
| O6    | B2    | N3              | 107.6(9)  |
| O5    | B2    | N3              | 101.2(8)  |
| C36   | B2    | N3              | 108.9(3)  |
| O4    | B2    | N3              | 104.1(9)  |
| O3    | B2    | N3              | 107.6(8)  |
| O8    | B3    | N4              | 104.3(3)  |
| O7    | B3    | N4              | 106.5(3)  |
| C82   | B3    | N4              | 109.1(3)  |

<sup>1</sup>1-X,-Y,2-Z;<sup>2</sup>2+X,-1+Y,1+Z;<sup>3</sup>-2+X,1+Y,-1+Z
